# Supplementary material for: High-Throughput Genetic Screens Identify a Large and Diverse Collection of New Sporulation Genes in Bacillus subtilis
Source: PLoS Biol. 2016 Jan 6;14(1):e1002341. doi: 10.1371/journal.pbio.1002341 (PMC4703394; doi:10.1371/journal.pbio.1002341)
Supplement: S1 Table — (XLSX) [file pbio.1002341.s014.xlsx]

## Sheet: Sheet1
sporulation genes identified at T24 by Tn-seq
	characterized sporulation genes
	less well characaterized sporulation genes
	new sporulation genes
	sporulation genes that were not underrepresented at T24
gene	p-valuea	T0/T24b	description
araR	1.23786e-12	24.243	repressor of arabinose utilization
asnO	1.57792e-15	35.9478	asaparagine synthase (σE regulon)
bofA	0.00108728	362	σK activation
ccdA	1.79987e-07	19.1981	spoVD oxidoreductase
clpC	7.78867e-16	600.746	ATPase subunit of ClpCP
cotE	0.0323805	2.29	outer coat protein (σE/σK regulons)
ctpB	6.11926e-06	2.90437	σK activation / signaling protease
cwlD	5.98357e-08	24.0872	δ-lactam PG formation
dacB	6.54386e-13	39.3387	DD-carboxypeptidase
defB	2.53409e-07	13.9662	N-formylcysteine deformylase
dgkA	2.56252e-05	170.296	undecaprenol kinase / spore cortex synthesis
divIVA	0.00321959	2.78656	division site selection / SpoIIE regulator / σF activity
dnaJ	5.62714e-08	19.0227	chaperone
dnaK	7.64453e-14	27.2194	chaperone
ecsA	3.50553e-09	81.482	ABC transporter family
ecsB	6.79045e-10	19.472	ABC transporter family
efp	3.00204e-07	199.935	elongation factor P (translation of proline-rich proteins)
fin	0.001776	4.76694	negative regulator of σF
ftsH	2.13578e-09	139.151	membrane protease degradation of spo0E, spo0M, spoIIE
gapB	1.02128e-12	16.093	GAP dehydrogenase
gerM	1.19909e-07	96.2646	spore cortex and/or germination (σE regulon)
gidA	1.87136e-09	13.7938	tRNA-modifying enzyme
gpr	1.10168e-09	1291	germination protease
grpE	0.00765897	2.91992	chaperone
gtaB	4.96299e-08	123.798	UDP-glucose pyrophosphorylase /σB
iolR	7.00744e-05	3.1889	repressor of myo-inositol catabolism
kbaA	0.037274	3.56085	regulator of KinB
kipA	0.0125645	3.05257	control of phosphorelay
lgt (gerF)	1.6764e-08	905.736	lipoprotein biosynthesis / modifier of germinant receptor
miaA	1.27323e-06	2.65623	tRNA-modifying enzyme
minC	0.00726815	2.67945	division site selection
minD	1.4342e-05	3.37149	division site selection
minJ	1.9887e-05	3.5447	division site selection
mntR	0.00215662	11.2314	trxn regulator of Mn++ transport
ndk	7.44826e-05	4.63836	nucleotide diphosphate kinase
nrnA	3.0401e-06	6.67618	nanoRNase
pdaA	6.68664e-08	1429	δ-lactam PG formation
pgcA	5.17357e-15	28.9017	UDP-glucose synthesis
prkA	0.00133066	2.08822	Ser/Thr protein kinase, σE regulon
prpC	0.000423868	5.98083	phosphatase
putB (ycgM)	0.00616352	3.44036	proline dehydrogenase (spo0A & σE regulons)
rasP	3.75066e-07	26.2717	intramembrane protease
resA	0.000655989	4.87536	heme translocase
rex (ydiH)	3.42132e-07	26.6691	transcriptional repressor
rsfA	0.00411998	9.11165	regulator of σF controlled genes
safA	0.000719718	2.66945	coat formation
skfE	1.42255e-07	19.1205	export of sporulation killing factor
skfF	4.10149e-23	57.3574	export of sporulation killing factor
sleB	0.000187863	3.26409	cortex lytic hydrolase
smpB	0.00129377	9.83432	tmRNA-binding protein
speD	0.00193948	2.43078	SAM decarboxylase
speE	5.16731e-06	3.72341	spermidine synthase
spmA	0.00044146	3.2138	cortex synthesis
spmB	0.00180596	2.90517	cortex synthesis
spo0A	1.59e-09	44.65	transcription factor
spo0B	0.00032	166.7	Spo0A activity / phosphorelay
spo0F	0.018	83.3	Spo0A activity / phosphorelay
spo0H (sigH)	3.45649e-09	825	sporulation initiation
spo0J (parB)	0.000948818	2.57677	origin segregation
spo0KA (oppA)	9.32841e-24	334.322	quorum sensing / Spo0A activity
spo0KB (oppB)	5.413e-18	5929	quorum sensing / Spo0A activity
spo0KC (oppC)	4.7822e-16	705.68	quorum sensing / Spo0A activity
spo0KD (oppD)	1.96639e-09	593.274	quorum sensing / Spo0A activity
spo0KE (oppF)	2.62092e-11	1184.54	quorum sensing / Spo0A activity
spoIIAA	0.00169593	246	anti-anti-σF factor
spoIIAB	3.75656e-05	1084	anti-σF factor
spoIIAC (sigF)	4.43291e-07	1135	forespore sigma factor
spoIIB	2.32721e-06	19.5387	engulfment
spoIID	5.37225e-09	11.555	engulfment / lytic transglycosylase
spoIIE	2.27072e-22	1610.55	σF activation / asymmetric septum
spoIIGA	1.08014e-07	337.579	σE activation / pro-σE protease
spoIIGB (sigE)	2.61105e-14	3399	mother cell sigma factor
spoIIJ (kinA)	3.80227e-14	17.828	Spo0A activity / sensor kinase
spoIIM	3.18785e-07	22.8625	engulfment
spoIIP	4.86671e-13	94.8346	engulfment / amidase-endopeptidase
spoIIQ	1.76279e-08	1254	σG activity / engulfment
spoIIR	1.24555e-06	1184.05	σE activation / forespore signal
spoIIT (ywmB)	4.75981e-10	5.88052	σE activation (σF regulon)
spoIIIAA	5.20998e-08	1239.39	σG activity / forespore potential
spoIIIAB	8.96396e-05	264.236	σG activity / forespore potential
spoIIIAC	5.7865e-05	647	σG activity / forespore potential
spoIIIAD	1.23656e-05	309.933	σG activity / forespore potential
spoIIIAE	1.1452e-13	1717	σG activity / forespore potential
spoIIIAF	1.58212e-09	280.168	σG activity / forespore potential
spoIIIAG	2.1783e-06	491	σG activity / forespore potential
spoIIIAH	1.98033e-07	1677	σG activity / engulfment
spoIIIC (sigK)	0.000230179	541	mother cell sigma factor
spoIIID	0.00160747	4.16972	mother cell transcription factor
spoIIIE	2.53206e-25	38.7287	DNA translocase
spoIIIG (sigG)	3.9172e-09	16.0437	forespore sigma factor
spoIIIJ	8.83414e-11	82.2436	σG activity / membrane chaperone
spoIIIL (yqzE)	0.00274801	15.9294	σG activity (σF regulon)
spoIVA	4.63833e-19	2206.32	spore coat assembly
spoIVB	2.68912e-14	288.73	σK activation / signaling protease
spoIVCA	3.53187e-22	974.995	σK activity / skin recombinase
spoIVCB (sigK)	1.9494e-09	106.691	mother cell sigma factor
spoIVFA	1.79036e-09	28.9995	σK activation
spoIVFB	3.55841e-10	36.4401	σK activation / pro-σK protease
spoIVH (stoA)	2.00224e-06	8.97216	spoVD oxidoreductase
spoVAA	1.86523e-05	6.50678	Ca:DPA import
spoVAB	0.00109389	6.24277	Ca:DPA import
spoVAC	2.26924e-06	49.4404	Ca:DPA import
spoVAD	3.23039e-09	1108	Ca:DPA import
spoVAEB	1.28294e-05	959	Ca:DPA import
spoVB	3.68015e-16	1263.21	cortex synthesis / lipid II flippase
spoVD	1.40062e-18	38.2139	spore cortex synthesis / class B PBP
spoVE	9.41296e-09	478.739	spore cortex synthesis
spoVFA	0.00011485	3.21765	DPA synthesis
spoVFB	0.0166338	3.41296	DPA synthesis
spoVG	0.00245646	2.65169	polar division / DNA binding
spoVK	7.47659e-10	24.3437	unknown
spoVM	0.0360028	197	spore coat assembly
spoVR	4.86226e-05	2.36354	spore cortex synthesis
spoVS	0.0468416	34.1597	spore coat assembly / DNA binding
spoVT	9.81093e-06	14.2973	forespore transcriptional regulator
spoVID	7.30945e-10	7.88852	spore coat assembly
spoVIE (pdaB)	7.2261e-06	518	polysaccharide deacetylase / synthetic with ∆spoVIGAB
spoVIF	0.0035572	20.0287	spore coat assembly
spoVIGA (ytrH)	6.38323e-05	12.4312	synthetic with ∆spoVIE
spoVIGB (ytrI)	1.58403e-05	5.9177	spore coat/cortex formation - synthetic with ∆spoVIE
trmE	3.41764e-07	13.6589	tRNA-modifying enzyme
ubiE (menH)	2.41549e-07	180.846	menaquinone synthesis
ugtP	5.17811e-15	211.484	lipid synthesis
uppP	2.66055e-08	132.726	minor UPP phosphatase
yaaD (pdxT)	8.73007e-05	11.0029	pyridoxal 5'-phosphate synthesis
yaaT	4.43152e-05	75.8547	Spo0A activity
yabP	0.000304566	507	unknown (σE regulon)
yabQ	2.97213e-11	2206	spore cortex synthesis (σE regulon)
ydcC	3.89999e-06	8.02405	σE regulon / slightly reduced σG activity
yerC	0.00011544	359	putative DNA-binding protein
yhbH	1.24728e-05	2.46598	unknown (σE regulon)
yjbH	3.74027e-07	6.12816	degradation of Spx / adaptor protein for ClpXP
ylbF	0.000920454	31.6826	Spo0A activity
ylbJ	2.92132e-13	801	cortex synthesis (σE regulon)
ymdB	2.64417e-07	14.7149	phosphodiesterase controlling bistable gene expression
ymcA	0.00298598	154	Spo0A activity
yqfC	0.000522738	32.2904	unknown (σE regulon)
yqfD	1.54472e-13	3448	similar to UDP-glucose 4-epimerase (σE regulon)
yqhT	2.77761e-10	22.0926	Xaa-Pro peptidase
ytaF	0.0141772	2.41281	engulfment
ytvI	6.68225e-09	15.1229	autoinducer-2 exporter (ai-2e) family (σE regulon)
ytxG	5.7966e-05	193	general stress protein (σB & σH regulons)
TCA cycle genes
gene	p-valuea	T0/T24b	description
citB	2.78045e-29	1510	aconitase
citZ	5.82284e-12	2768	citrate synthase
icd	5.70032e-10	6.25093	isocitrate dehydrogenase
mdh	4.45281e-11	44.5494	malate dehydrogenase
odhA	1.15563e-10	9.34958	2-oxoglutarate dehydrogenase
odhB	3.64442e-05	23.4797	2-oxoglutarate dehydrogenase
pdhA	1.71249e-08	148	pyruvate dehydrogenase
pdhB	8.39391e-06	60.2819	pyruvate dehydrogenase
pdhC	5.02842e-06	79	pyruvate dehydrogenase
pdhD	2.421e-06	8.92	pyruvate dehydrogenase
sdhA	4.28514e-14	499	succinate dehydrogenase
sdhB	4e-06	5.05298	succinate dehydrogenase
sdhC	2.04385e-06	233	succinate dehydrogenase
sucC	7.30697e-13	29.1467	succinyl-CoA synthetase
sucD	3.93316e-12	402.884	succinyl-CoA synthetase
sporulation genes that were not underrepresented at T24
gene	p-valuea	T0/T24b	description	possible explanationc	underrepresented at T5?d
abrB	0.00303942	1.64821	transition state regulator	mild sporulation defect	Yes
fisB	0.0252991	1.69047	membrane fission	mild sporulation defect	Yes
gerE	0.057	12.7805	mother cell transcriptional regulator	small gene, few insertions	No
gin (csfB)	0.233072	1.12932	σG activity	very mild sporulation defect	No
kinB	0.016647	1.31517	sensor kinase / Spo0A activation	mild sporulation defect	Yes
racA	0.147426	1.30192	axial filament formation / origin anchoring	mild sporulation defect	Yes
spo0E	0.0935694	1.92451	phophatase / negative regulator of Spo0A activation	very mild sporulation defect	No
spo0M	0.0612559	1.1129	Spo0A activity	no sporulation defecte	No
spoIISA	0.0808688	1.26159	toxin	no sporulation defecte	Yes
spoIISB	0.0806188	3.56406	anti-toxin	very few insertions	No
spoVAEA	0.175392	0.844088	Ca:DPA import	mild sporulation defecte	No
spoVAF	0.190916	0.987926	Ca:DPA import	no sporulation defecte	No
spoVN (ald)	0.0111099	1.76556	L-alanine dehydrogenase	mild sporulation defect	Yes
ylzA (remA)	0.028	1.3182	regulator of matrix genes	very few insertions	No
ypjB	0.244393	1.05359	unknown (σE regulon)	very mild sporulation defect	Yes
ap-value based on Mann-Whitney U test
bT0/T24 refers to the fold change based on the ratio of number of transposon insertions at T0 compared to the number at T24
cpossible explanation for why insertions in the indicated gene were not underrepresented at T24
dunderrepresented at T5 indicates whether insertions in this gene were underrepresented at T5
eexperimentally determined in this study
