# Supplementary material for: High-Throughput Genetic Screens Identify a Large and Diverse Collection of New Sporulation Genes in Bacillus subtilis
Source: PLOS journal article supplement (doi:10.1371/journal.pbio.1002341), 2016-01-06

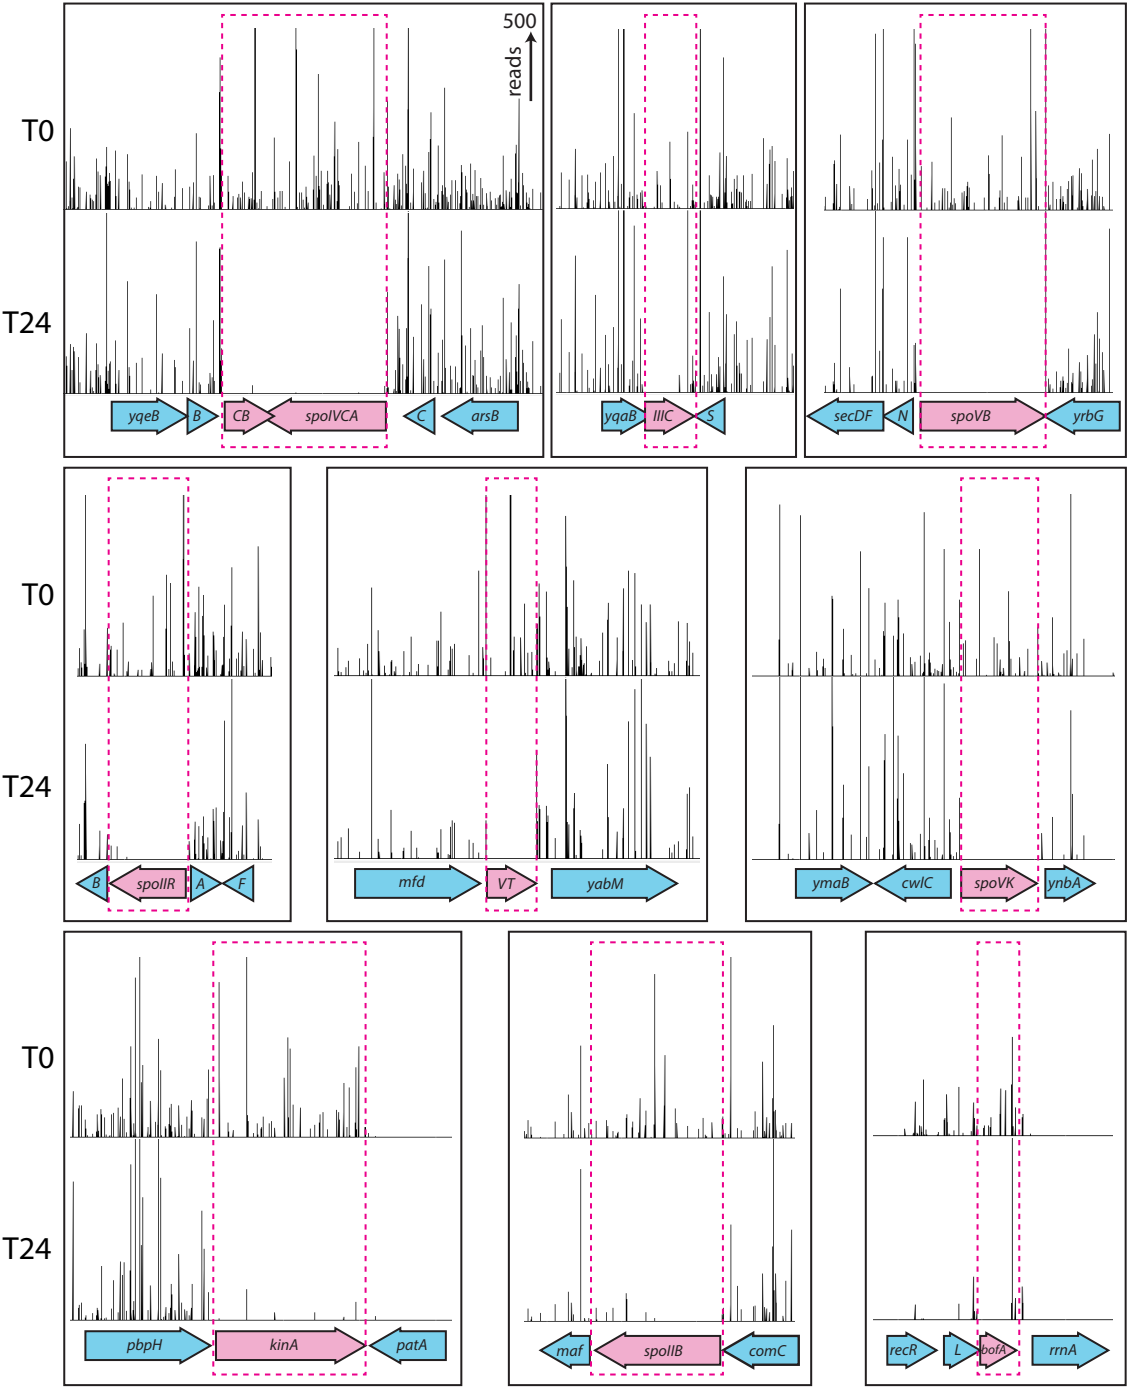

Supplement: S2 (10.1371/journal.pbio.1002341.s002) [file journal.pbio.1002341.s002]
